# Supplementary material
Source: Springer Nature journal article supplement (https://www.springermedizin.de/resource/supplementary/12879_2012_2148_MOESM5_ESM.pdf/9443756)

*Pseudomonas aeruginosa*

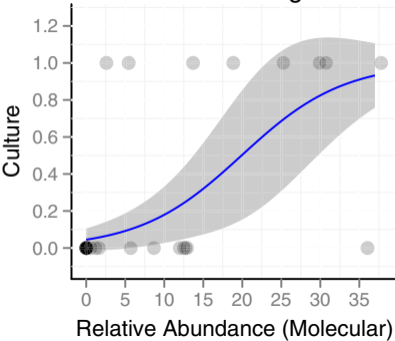

*Staphylococcus aureus*

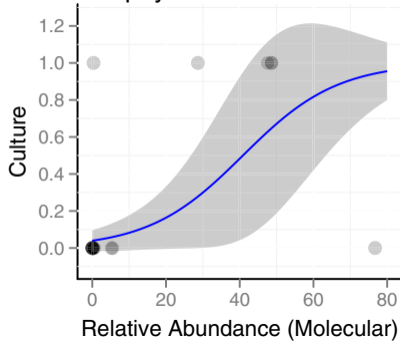

*Enterococcus faecalis*

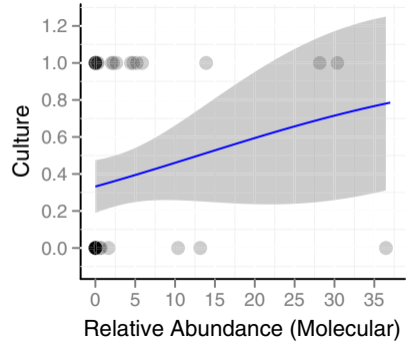

Supplement: MOESM5 [file 9443756]
